# Supplementary material
Source: publisher figshare collection journal article supplement (https://gsapubs.figshare.com/ndownloader/files/23319941)
Supplement: Supplementary file 1 [file 23319941]

## Sheet: Sheet1
Table DR5. Major and trace element abundances for melt inclusions back-calculated for parental primary melt compositions using the PRIMACALC 2.0 software from Kimura and Ariskin (2014)
				PRIMACALC OUTPUT: Primary melt																																					PRIMACALC OUTPUT: step 8
Sample no.	Volcano	Eruption	Type	SiO2	TiO2	Al2O3	FeO	MnO	MgO	CaO	Na2O	K2O	P2O5	SUM	Rb	Ba	Th	U	Nb	Ta	K	La	Ce	Pb	Pr	Sr	Nd	Sm	Zr	Hf	Eu	Gd	Tb	Dy	Y	Ho	Er	Tm	Yb	Lu	Ni (ppm)	Ni (ol) wt%	Eq Fo (ol)%	Mg# Bas	Fe2+/Fe(t)	Temp Wet (Katz)	Temp Dry (Herz)	P GPa	F% (Herz)
P2224_m1_2.1	Taupo	Waimihia (3.2 ka)	Mafic enclave	48.8555	0.675639	14.1111	11.2693	0.165135	13.4096	9.23607	1.73713	0.322079	0.218473	100	8.09175	98.7992	0.962303	0.257217	1.56446	0.115429	2605.14	5.0449	11.9083	1.9694	1.58567	213.371	7.29959	1.65918	43.9863	0.893312	0.685927	2.30099	0.304415	1.8789	12.08	0.46109	1.24892	0.201881	1.25872	0.149108	280.067	0.261709	88.3004	0.679589	0.839	1372	1386.78	1.5	9.37374
P2224_m1_2.3	Taupo	Waimihia (3.2 ka)	Mafic enclave	49.1059	0.741078	14.0938	10.5475	0.195967	13.0971	10.1446	1.55873	0.296807	0.218491	100	7.27595	95.8107	0.856194	0.21055	1.70522	0.111058	2351.13	4.24443	11.168	1.69723	1.47114	194.86	6.55339	1.68172	39.9141	1.00574	0.740166	2.3928	0.367864	2.34702	12.6353	0.515532	1.24202	0.179985	1.30111	0.167859	183.852	0.180612	88.8156	0.688795	0.836	1360	1373.51	1.4	6.72599
P2224_1.1av	Taupo	Waimihia (3.2 ka)	Mafic enclave	48.7529	0.679582	14.3635	10.4835	0.223944	13.5788	9.60967	1.78583	0.339499	0.182699	100	7.04937	103.036	0.990425	0.166093	1.83748	0.115336	2692.46	5.86115	13.7483	2.11463	1.78334	218.059	8.83364	2.24322	47.4179	1.32441	0.710183	2.43301	0.461448	2.54246	14.6467	0.494936	1.58058	0.166973	1.20557	0.309255	256.356	0.239522	89.1837	0.697769	0.838	1381	1395.45	1.6	9.20129
P2224_2.1	Taupo	Waimihia (3.2 ka)	Mafic enclave	48.3002	0.658546	14.5972	11.1389	0.196946	13.6466	9.46919	1.74691	0.15362	0.0918304	100	2.06077	44.6901	0.464024	0.0883431	1.10641	0.107964	1265.37	3.31988	8.94379	1.03524	1.25456	197.864	5.37375	1.70824	35.9345	0.926201	0.603267	2.14349	0.450922	2.54351	15.8982	0.523547	1.96942	0.234892	1.54481	0.297403	252.071	0.230343	88.5446	0.685905	0.842	1389	1402.69	1.7	10.508
P2202A_1.1A	Taupo	Waimihia (3.2 ka)	Mafic enclave	49.8287	0.673101	13.881	8.84349	0.222257	13.2008	11.4523	1.59379	0.168205	0.136251	100	2.62921	49.5716	0.433881	0.0981173	1.36056	0.0879327	1373.31	3.39397	8.26277	1.21206	1.23622	199.964	6.24387	2.23098	33.3466	1.11992	0.61518	2.43494	0.408192	2.2278	13.3722	0.586784	1.53141	0.198397	1.30883	0.374028	148.627	0.150605	90.6452	0.726828	0.827	1349	1371.33	1.2	4.14272
P2202A_3.1	Taupo	Waimihia (3.2 ka)	Mafic enclave	49.8533	0.672454	13.8656	8.81163	0.221288	13.1766	11.4944	1.5957	0.169283	0.139753	100	2.62911	49.558	0.433881	0.0981174	1.36066	0.0879388	1373.07	3.39472	8.26743	1.21045	1.23724	199.458	6.25152	2.23519	33.3742	1.12195	0.616485	2.44057	0.40918	2.23326	13.4047	0.588203	1.53496	0.198832	1.31152	0.374755	146.187	0.148615	90.66	0.72718	0.827	1347	1369.67	1.2	4.03528
WaiOu-2mi1	Taupo	Waimihia (3.2 ka)	Mafic enclave	49.389	0.69586	13.8095	9.43011	0.197004	13.1825	11.3482	1.65985	0.161693	0.126351	100	3.50749	60.5873	0.532869	0.107235	1.45656	0.0808277	1304.17	4.07789	10.315	1.52605	1.50085	217.842	7.09343	1.96842	39.3909	1.19511	0.698443	2.36854	0.39306	2.69764	15.0212	0.531657	1.62	0.262973	1.64086	0.204576	172.028	0.172291	90.031	0.713608	0.828	1366	1377.85	1.4	4.59765
WaiOu-1mi1a	Taupo	Waimihia (3.2 ka)	Mafic enclave	49.5209	0.657557	13.7902	7.86417	0.22864	13.1104	13.1215	1.4816	0.143004	0.0819677	100	2.76968	50.2761	0.421755	0.0887544	1.25512	0.0735368	1200.24	3.53047	9.10244	1.26894	1.32284	226.09	6.71912	1.92233	34.3294	1.11626	0.753514	2.35044	0.379121	2.61608	14.8615	0.555588	1.57304	0.253315	1.52606	0.222632	116.982	0.122612	91.6531	0.748209	0.82	1328	1376.73	1.3	1.34537
WaiOu-1mi1b	Taupo	Waimihia (3.2 ka)	Mafic enclave	49.6736	0.676557	13.7648	7.97379	0.19768	13.1086	12.9394	1.38714	0.138333	0.14014	100	2.8045	49.6781	0.425952	0.105414	1.29773	0.0720961	1178.75	3.52604	9.28507	1.2781	1.3736	225.087	6.8189	2.029	34.9176	1.14434	0.734866	2.39131	0.371436	2.74192	14.7749	0.536579	1.54515	0.242649	1.61326	0.241745	123.104	0.12874	91.5253	0.745565	0.821	1324	1373.43	1.2	2.05793
P560_m1_3.1	Taupo	Oruanui (25.4 ka)	Mafic enclave	48.7864	0.641961	14.3734	9.85156	0.20044	13.4951	10.9311	1.39802	0.187822	0.13425	100	2.42022	58.0157	0.296305	0.112676	0.852589	0.0534958	1510.01	2.71681	7.47695	0.888498	1.14197	223.7	5.39056	1.59524	23.834	0.534909	0.487982	1.50605	0.254917	1.60252	8.86603	0.363388	0.911681	0.154197	0.941773	0.126381	354.149	0.337865	89.7025	0.709444	0.837	1385	1396.69	1.5	6.51089
P1342_1.1	Taupo	Oruanui (25.4 ka)	Mafic enclave	49.4226	0.58189	14.4218	9.99192	0.221703	13.7558	9.8757	1.52201	0.143213	0.0634483	100	1.78669	38.3972	0.156481	0.0657915	0.658385	0.0658385	1161.6	1.90036	5.16308	0.756539	0.822346	168.689	4.23388	1.06439	23.4421	0.347841	0.525243	1.57968	0.241753	1.66831	9.73832	0.361593	0.917645	0.168464	1.3954	0.126057	296.801	0.275234	89.7178	0.710471	0.839	1370	1385.05	1.3	8.01221
P1342_4.2	Taupo	Oruanui (25.4 ka)	Mafic enclave	49.6758	0.653006	14.6259	9.88267	0.172299	13.4554	9.85131	1.45438	0.143936	0.0853263	100	3.0099	57.4162	0.34048	0.165757	0.878668	0.22415	1171.23	2.80899	7.70319	1.05838	1.11068	189.944	4.73176	1.39554	26.6167	0.571662	0.538301	1.61893	0.457128	1.68969	8.98676	0.410912	0.980374	0.236839	0.958873	0.189183	246.466	0.236327	89.6138	0.708186	0.841	1361	1373.16	1.1	7.82625
P560_m2_3.1	Taupo	Oruanui (25.4 ka)	Mafic enclave	49.221	0.564708	14.3731	10.7812	0.185703	13.763	9.40666	1.46253	0.158159	0.0838816	100	1.89375	44.1231	0.24833	0.0842861	0.860763	0.112438	1262.2	3.21188	7.00156	0.806509	0.961159	162.211	4.4422	0.933537	25.5854	0.598731	0.525968	1.62204	0.317526	1.40612	8.46284	0.264212	0.918008	0.130941	0.745962	0.18342	241.008	0.219576	88.9269	0.694697	0.843	1372	1385.21	1.3	9.18286
P950_1.1Av	Taupo	Oruanui (25.4 ka)	Mafic enclave	48.5378	0.47927	15.6403	8.4105	0.200062	13.2011	12.0004	1.36588	0.0982293	0.0665373	100	2.41432	37.6312	0.323638	0.056312	0.972381	0.0906586	807.604	2.44248	5.51619	0.967122	0.954594	198.643	5.04765	1.61869	25.3308	0.955062	0.510853	2.0056	0.308033	2.13634	12.2222	0.530237	1.65826	0.262527	1.38144	0.330273	299.117	0.303666	90.9914	0.736685	0.835	1344	1386.09	1.5	2.80336
P560_1.1	Taupo	Oruanui (25.4 ka)	Mafic enclave	48.3614	0.607306	14.3627	11.9739	0.179302	13.4798	9.33328	1.47352	0.15893	0.0699755	100	2.61013	51.5443	0.346198	0.0645589	0.757759	0.0832599	1288.29	2.70679	7.02203	1.235	1.02972	213.32	5.14773	1.97444	29.5	1.31107	0.571074	2.28346	0.245367	1.57328	11.7155	0.61852	1.72596	0.356579	1.06074	0.234286	224.81	0.204941	87.5601	0.667402	0.847	1395	1394.93	1.6	10.8253
950-1	Taupo	Oruanui (25.4 ka)	Mafic enclave	49.0542	0.634713	14.3089	9.75553	0.202616	13.3749	10.8853	1.50177	0.14587	0.136269	100	2.256	53.063	0.342013	0.0805221	0.783065	0.0488223	1188.19	2.97796	7.33757	1.01691	1.07891	210.993	5.52008	1.62248	27.5128	0.877314	0.576944	1.90127	0.295139	2.21244	12.2869	0.425786	1.3331	0.192927	1.28122	0.199506	221.369	0.214996	89.7546	0.709619	0.835	1375	1386.88	1.4	6.23354
950-3mi1	Taupo	Oruanui (25.4 ka)	Mafic enclave	48.7434	0.582464	14.3652	10.3018	0.228801	13.7614	10.2679	1.53569	0.154393	0.0589031	100	1.85438	42.7356	0.338274	0.0750719	0.891837	0.0530329	1247.87	2.60993	6.74048	0.944347	0.982699	195.637	4.95886	1.5967	28.3225	0.907371	0.609342	2.12199	0.306699	2.34993	12.4392	0.480243	1.4144	0.199654	1.31342	0.197612	476.218	0.436674	89.4152	0.704235	0.839	1384	1399.55	1.6	7.73031
Kah2_Large5av	Okataina	Kaharoa (0.7 ka)	Mafic enclave	46.9012	0.808544	13.7851	12.0238	0.207971	13.8698	10.4801	1.50402	0.285443	0.134053	100	4.96418	153.769	0.44031	0.159044	1.4938	0.0842726	2297.13	5.61248	12.2643	1.23031	1.79351	187.35	9.75266	1.90972	32.1049	0.840868	0.804665	2.2649	0.386722	2.4866	14.0849	0.544441	1.37352	0.154515	1.58622	0.152524	221.25	0.194231	87.9023	0.672787	0.842	1434	1434.02	2.18182	8.45047
Kah2_Small6	Okataina	Kaharoa (0.7 ka)	Mafic enclave	46.1271	0.59676	13.2226	14.0513	0.21658	14.2105	9.86625	1.35189	0.256013	0.101132	100	6.29082	132.934	0.525071	0.1322	1.50001	0.0834382	2050.04	3.48189	9.47586	1.39702	1.24762	238.15	6.47161	1.50038	33.312	0.957167	0.853698	1.50051	0.281528	1.97061	12.1144	0.619742	1.38151	0.197425	1.60814	0.174267	160.568	0.130297	86.2069	0.643194	0.848	1450	1449.95	2.55556	11.6363
KAH2L_2.1	Okataina	Kaharoa (0.7 ka)	Mafic enclave	50.0849	0.62866	12.8493	8.97704	0.221603	13.294	12.0793	1.45731	0.308772	0.0991234	100	7.57268	131.687	0.992317	0.167925	1.69292	0.187156	2475.92	4.73069	12.8524	2.35003	1.69846	236.608	8.18699	2.35491	46.3624	1.14272	0.79721	2.88958	0.481121	2.53408	14.727	0.586885	2.07037	0.179176	1.14589	0.253637	103.397	0.103806	90.578	0.725246	0.821	1359	1380.65	1.3	3.31409
KAH2S_1.1	Okataina	Kaharoa (0.7 ka)	Mafic enclave	47.4496	0.613163	13.1715	13.0117	0.268107	14.0557	9.75767	1.34255	0.244246	0.0857674	100	5.95105	134.371	0.658416	0.206296	1.47455	0.123757	1958.3	3.78775	9.54916	1.54495	1.44924	233.501	8.1669	1.41352	35.2376	0.940207	0.614881	2.47611	0.36204	1.92434	13.9397	0.483662	1.56687	0.169431	1.61217	0.307788	138.212	0.116655	87.0691	0.658175	0.843	1405	1421.4	2	9.07398
Okareka10	Okataina	Okareka (21.9 ka)	Scoria	46.1178	0.763589	13.2286	15.6408	0.252307	13.329	8.6603	1.52147	0.346283	0.139856	100	8.26501	122.036	0.71968	0.149796	1.89203	0.0954385	2834.02	5.85099	13.4436	1.93466	1.9356	248.32	8.44469	2.02246	46.0302	1.15977	0.820969	1.87937	0.390838	2.83324	12.9623	0.49574	1.24397	0.138171	1.25842	0.173725	113.806	0.0969748	84.0036	0.603017	0.848	1428	1427.55	2.42857	15.9242
Okareka_3.1	Okataina	Okareka (21.9 ka)	Scoria	43.9757	0.258838	18.6786	9.39561	0.0941914	12.8116	13.6796	0.818429	0.141841	0.145461	100	9.81948	117.819	0.941379	0.242307	1.86049	0.0991717	2543.33	5.07907	12.1946	2.38656	1.80278	295.751	9.01964	2.75672	45.9939	1.20782	0.585353	1.91428	0.344093	2.30605	14.1484	0.64524	1.57187	0.155	1.09731	0.2792	197.946	0.209143	90.9383	0.708498	0.848	1055	1292.48	0	0
Onga1_10.1_1	Inter-caldera cone	Ongaroto	Lava	48.3568	1.00551	14.8021	9.57265	0.157463	13.7233	9.42974	2.23225	0.453846	0.266332	100	12.0066	199.13	1.35359	0.301646	6.41879	0.425342	3638.13	15.001	36.9571	3.25808	5.29113	384.785	23.4047	7.15535	141.67	3.38686	1.83802	5.70549	0.929004	4.61578	28.9567	0.929622	2.78172	0.504186	2.58004	0.300185	2356.64	2.13242	90.2754	0.718732	0.838	1405	1405.04	1.8	12.1395
Onga4_1	Inter-caldera cone	Ongaroto	Lava	47.9271	1.04067	14.8681	9.23679	0.18353	13.9413	9.77543	2.2189	0.453747	0.354491	100	3.74569	78.9924	0.621389	0.195286	3.11542	0.195268	3643.15	7.38359	18.6528	2.3967	2.99288	134.926	16.1609	2.37929	98.6111	1.9545	1.46547	4.52815	0.746288	4.37982	23.5602	0.720069	1.75274	0.445005	1.29984	0.506686	525.96	0.484913	90.694	0.729019	0.838	1414	1424.77	1.9	11.2977
Onga3-2mi1	Inter-caldera cone	Ongaroto	Lava	47.7888	1.13223	15.5113	9.2072	0.184219	13.1331	10.3192	2.06802	0.391643	0.264303	100	8.06191	205.003	1.11832	0.284199	4.23908	0.247125	3158.37	10.6208	23.6789	2.1883	3.64008	267.987	16.6689	4.16626	104.715	2.38144	1.38298	4.5093	0.625505	4.53121	24.8932	0.900479	2.68285	0.396556	2.47136	0.364464	1520.81	1.49132	90.264	0.717712	0.836	1395	1394.66	1.8	7.55081
Onga3-1mi1a	Inter-caldera cone	Ongaroto	Lava	47.7876	1.13158	15.5141	9.20383	0.183855	13.1278	10.3198	2.06763	0.391401	0.272363	100	10.1361	275.09	1.59334	0.382009	5.72476	0.292328	3158.35	13.0222	26.279	3.55881	3.95336	220.84	17.0171	4.08151	119.239	2.76086	1.21545	4.46485	0.679358	4.21532	24.0922	0.868952	2.47318	0.409295	2.37462	0.380016	426.681	0.428177	90.2938	0.717705	0.836	1391	1390.54	1.8	7.18992
Onga3-1mi1b	Inter-caldera cone	Ongaroto	Lava	49.298	0.896382	15.262	6.63555	0.0942179	13.5236	11.3967	2.17427	0.516186	0.203	100	8.8512	245.321	1.4293	0.333285	5.02601	0.274577	4068.86	11.9216	24.0627	3.27418	3.57678	210.656	16.1371	3.84811	109.294	2.7036	1.17171	4.20908	0.642777	3.86151	23.0625	0.864034	2.40395	0.371733	2.31532	0.381262	320.177	0.328817	93.1258	0.784145	0.822	1358	1394.38	1.6	3.42421
Onga1b-1mi1	Inter-caldera cone	Ongaroto	Lava	48.2541	1.02531	15.1018	8.64431	0.105416	13.7035	10.2025	2.28282	0.467948	0.212257	100	14.7663	298.299	2.35566	0.658654	9.02265	0.460191	3782.83	22.1545	50.8943	9.19565	7.07007	350.343	31.0582	7.17637	184.886	4.22543	2.20276	7.50323	1.11987	7.43525	42.2675	1.48076	4.34979	0.636788	4.28907	0.609709	679.473	0.649925	91.1913	0.738607	0.833	1406	1415.59	1.9	8.35547
Kin1_2.1_1	Inter-caldera cone	Kinloch	Scoria	49.7226	1.06423	12.7059	9.90226	0.235673	12.9193	11.1834	1.87322	0.222053	0.171395	100	3.58743	82.5566	0.403517	0.15805	2.75411	0.218567	1815.86	5.51153	14.2095	1.23008	2.04951	255.93	10.4129	3.11618	66.5737	1.87565	0.990327	3.39048	0.545917	3.24021	18.0389	0.700986	1.90033	0.24441	1.77863	0.346523	116.204	0.119016	89.5807	0.699297	0.82	1352	1365.02	1.3	4.03031
Kin1_2.4	Inter-caldera cone	Kinloch	Scoria	49.8144	1.03578	12.46	10.1636	0.191928	13.0947	10.9838	1.86646	0.23376	0.155508	100	4.24581	80.6801	0.486933	0.116541	2.20933	0.256154	1916.7	5.40321	13.3164	0.9374	2.14939	257.436	9.8231	3.04837	62.8246	2.28655	0.757755	2.84976	0.560791	2.79966	18.5722	0.705977	2.41755	0.222502	1.8101	0.318391	120.723	0.120859	89.4253	0.696647	0.821	1354	1366.42	1.3	4.20912
Kin1_2.6	Inter-caldera cone	Kinloch	Scoria	48.5115	1.01735	13.3436	12.0108	0.220601	13.2948	9.16139	2.05002	0.245719	0.144131	100	4.29519	87.7426	0.510666	0.0968537	2.80769	0.308054	1982.33	6.34803	14.367	1.20601	2.10649	259.828	10.929	3.10279	74.9645	1.80857	0.961517	2.68069	0.609058	3.41593	17.0526	0.706781	2.08731	0.210586	1.72608	0.39753	225.472	0.210548	87.642	0.663639	0.835	1374	1390.09	1.6	8.65862
Kin1_11.1	Inter-caldera cone	Kinloch	Scoria	49.4316	0.92182	12.9485	8.12736	0.214431	13.3807	13.1423	1.54806	0.155567	0.129564	100	2.92342	68.6301	0.32837	0.0852363	1.86206	0.160207	1342.4	4.25599	11.3697	0.764987	1.73989	267.79	8.98203	2.77159	52.9697	1.88481	0.903416	2.84095	0.436765	3.53956	18.1221	0.650169	1.90911	0.231642	1.57125	0.323407	141.27	0.143513	91.5968	0.745845	0.815	1330	1381.43	1.4	1.16789
Kin1_11.2_1av	Inter-caldera cone	Kinloch	Scoria	49.7689	0.928935	12.4465	7.86885	0.232842	13.4864	13.4921	1.5051	0.161049	0.109343	100	2.66669	63.526	0.290395	0.106613	1.77672	0.131013	1381.18	4.023	10.494	0.954323	1.72372	260.875	8.09381	2.33247	53.299	1.4093	0.925571	3.09802	0.533132	3.3708	16.5323	0.69317	1.70365	0.253741	1.56699	0.370432	121.5	0.123033	91.9368	0.753388	0.812	1379	1379.02	1.3	1.5304
Kin1_7	Inter-caldera cone	Kinloch	Scoria	49.1522	0.977045	13.1731	7.9745	0.202009	13.5131	13.126	1.61597	0.163575	0.102663	100	2.60455	67.059	0.309912	0.0968489	1.92014	0.153055	1412.24	4.22902	10.8139	1.02302	1.69418	268.753	7.5488	2.43253	51.8216	1.28932	0.859702	2.71456	0.467215	3.14638	17.2117	0.625131	2.1842	0.257488	1.58731	0.221288	143.501	0.144229	91.8048	0.75127	0.816	1391	1391.49	1.54545	1.29219
All calculations performed using the default settings for PRIMACALC 2, assuming 2 wt. % H2O for melts and Kd (Ni) values for olivine from Li and Ripley (2010). % Xfrac indicates the amount of crystal fractionation required to link the primary magma with the analysed melt inclusions. Samples with <20 % Xfrac typical only require olivine fractional crystallization. Samples with >20% Xfrac may have …
References cited:		Li, C., and E.M. Ripley, 2010, The relative effects of composition and temperature on olivine-liquid Ni partitioning: Statistical deconvolution and implications for petrologic modeling: Cheical Geology, v. 275, p. 99–104.
		Kimura, J-I, and Ariskin, A.A., 2014, Calculation of water-bearing primary basalt and estimation of source mantle conditions beneath arcs: PRIMACALC2 model for WINDOWS: Geochemistry, Geophysics, Geosystems, v. 15, p. 1494–1514.
[truncated: 2 more columns]
